# Supplementary material for: Coordination polymers with 4,4′-bipyrimidine. Using a combination of endo- and exodentate donors to build a one-dimensional Ag(i) ladder and a heterometallic Co(ii)Ag(i)2 network
Source: Royal Society of Chemistry journal article supplement (doi:10.1039/b711960g), 2007-01-01
Supplement: b711960g.pdf [file b711960g.pdf]

Electronic Supplementary Information for:

## Coordination polymers with 4,4'-bipyrimidine. Using a combination of endo- and exodentate donors to build a one-dimensional Ag(I) ladder and a

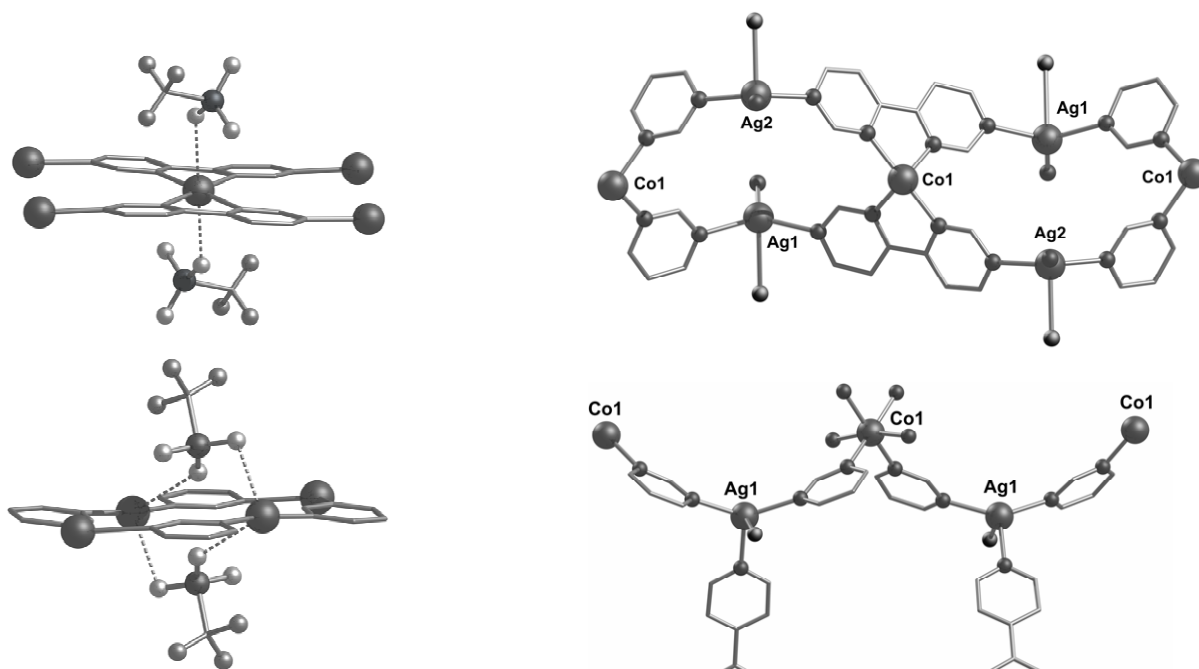

**Fig. S-1** Top: A view of the X-ray structure of  $[\text{Ag}_3\text{L}_2][\text{OTf}]_3$  showing the interaction of OTf anions with square planar Ag1 centres. Bottom: A view of the X-ray structure of  $[\text{Ag}_3\text{L}_2][\text{OTf}]_3$  showing the interaction of OTf anions with linear Ag2 centres.

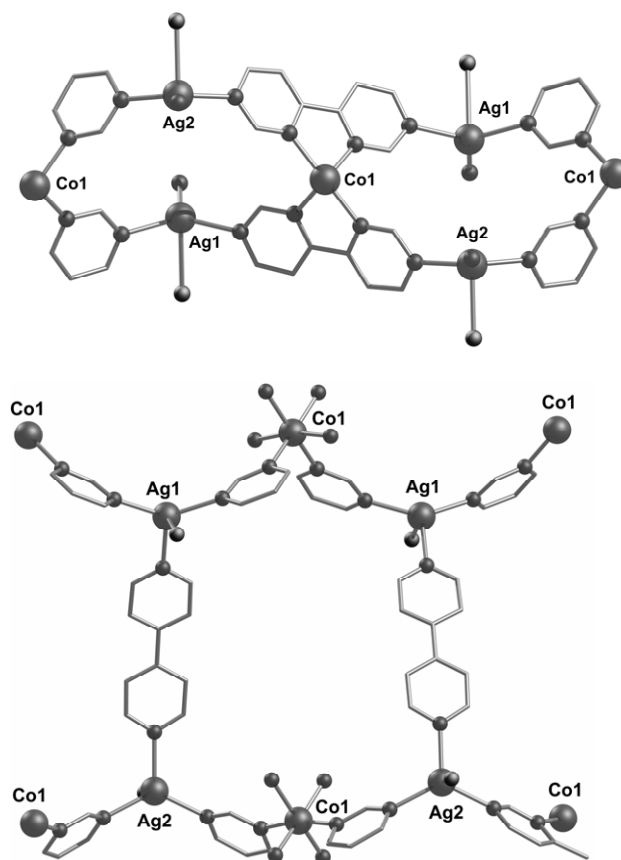

**Fig. S-2** Top: A view of the X-ray structure of the network polymer  $\{[\text{CoAg}_2\text{L}_3]^{4+}\}_x$ , showing how the Co(II) centres are bridged by coordination to Ag(I) centers using the exodentate N-atoms of 4,4'-bipyrimidine. Bottom: A view of the X-ray structure of the same network polymer  $\{[\text{CoAg}_2\text{L}_3]^{4+}\}_x$  rotated  $90^\circ$  from above, showing how a third ligand of 4,4'-bipyrimidine, that is not coordinated to the Co(II) centres, bridges the Co(II) containing strands shown above.

## heterometallic Co(II)Ag(I)<sub>2</sub> network

Derek A. Beauchamp and Stephen J. Loeb\*
